# Supplementary material for: The interplay between climatic niche evolution, polyploidy and reproductive traits explains plant speciation in the Mediterranean Basin: a case study in Centaurium (Gentianaceae)
Source: Frontiers journal article supplement (doi:10.3389/fpls.2024.1439985), 2024-08-09

**Figure S3.** Reconstruction of ancestral states under stochastic mapping of **A)** ploidy levels (2x, 4x and 6x) **B)** ploidy level (diploid vs. polyploid), **C)** floral size (small to medium vs. large), **D)** floral display (low vs. high), **E)** herkogamy (low herkogamy vs. high-herkogamy) and **F)** life cycle (annual/biennial vs. perennial).

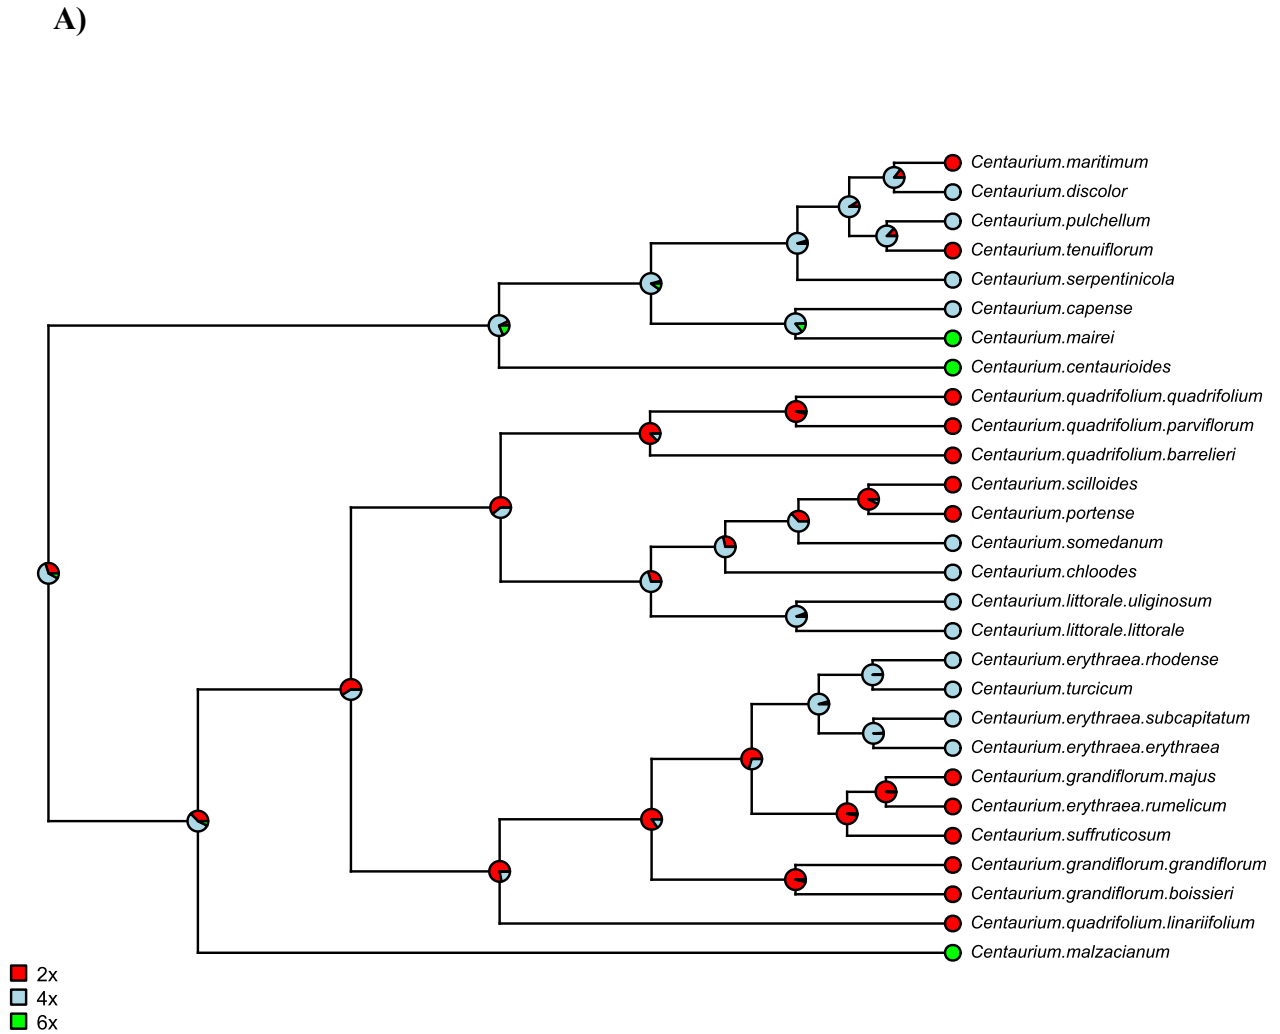

B)

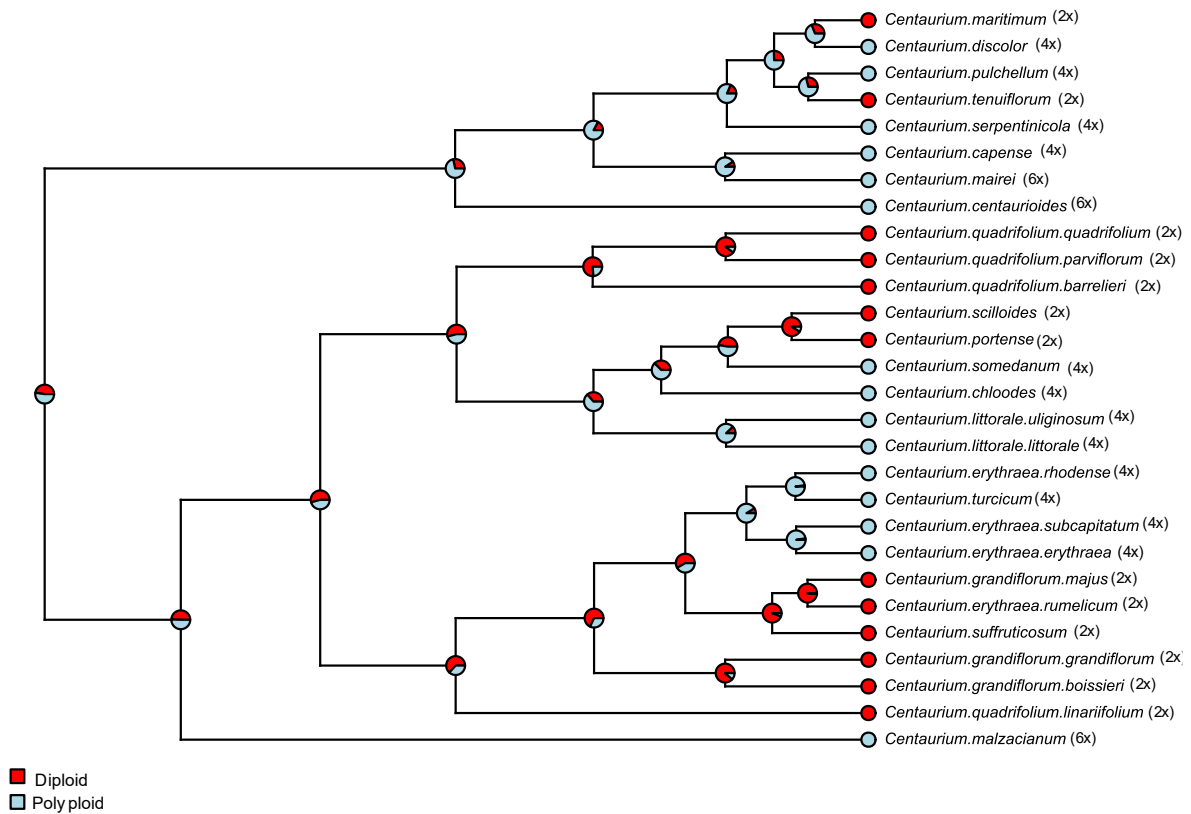

C)

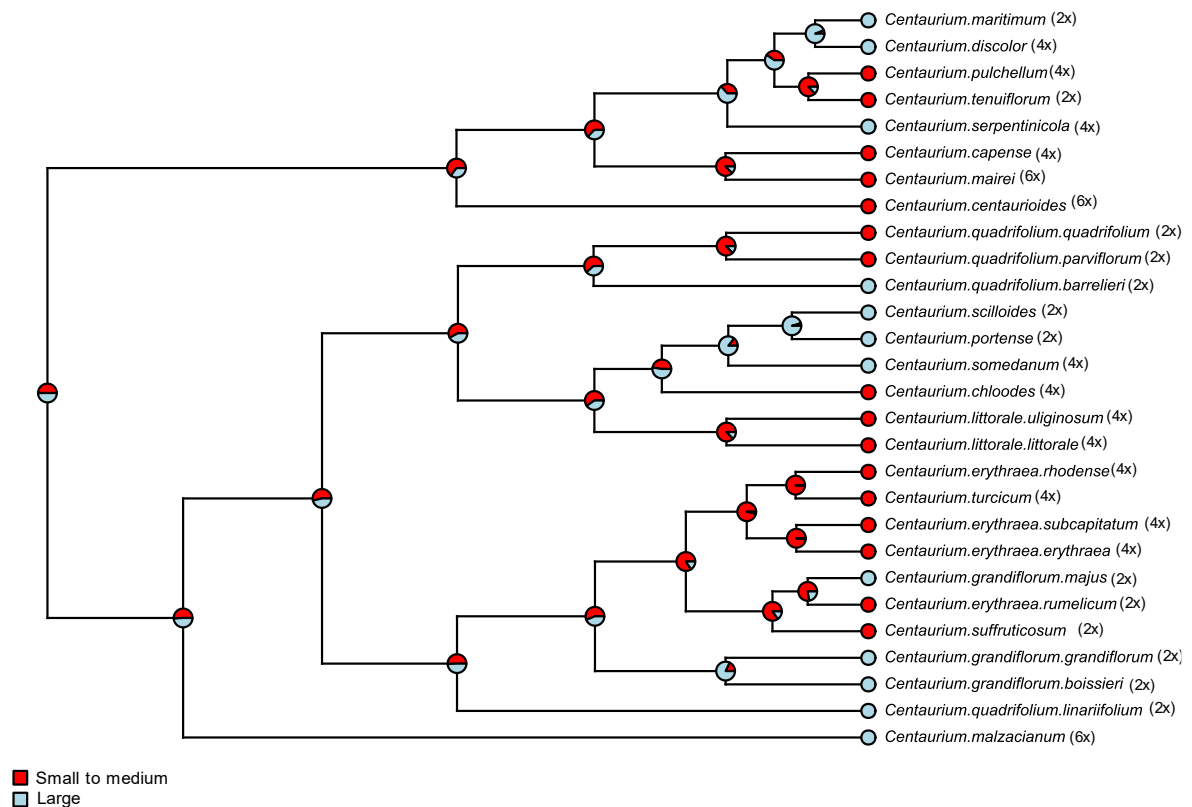

D)

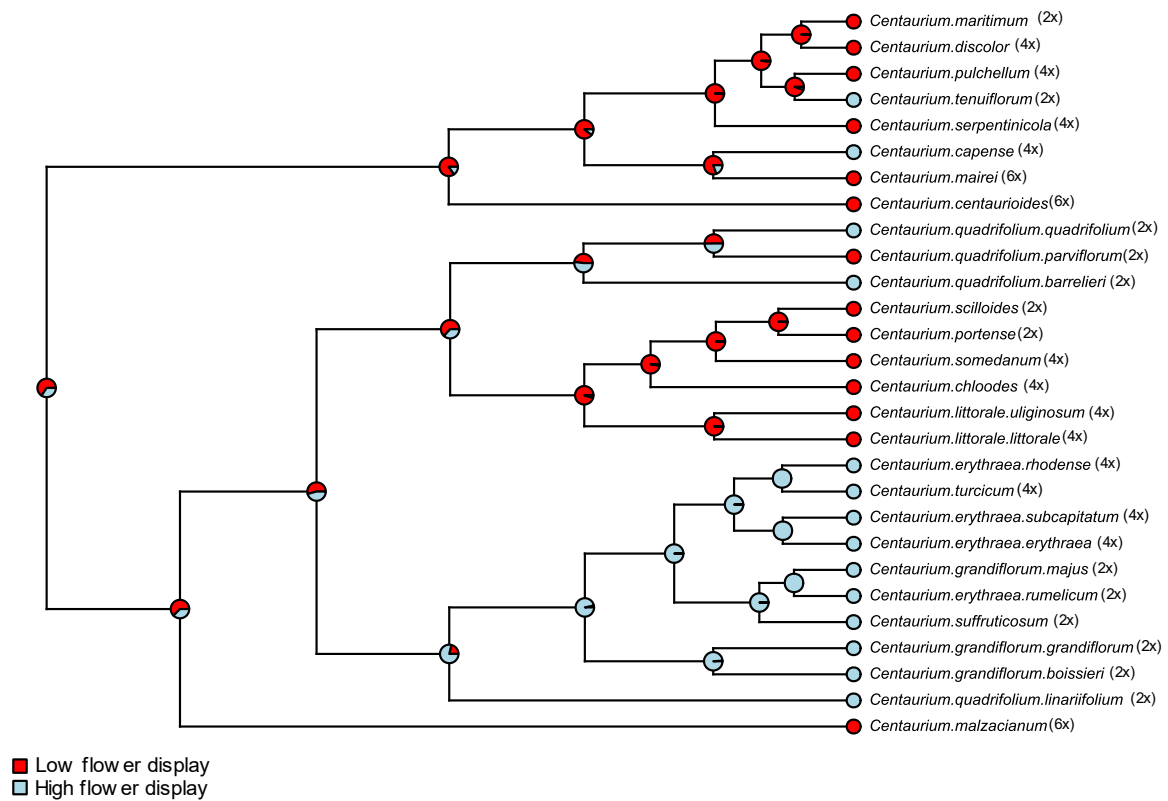

E)

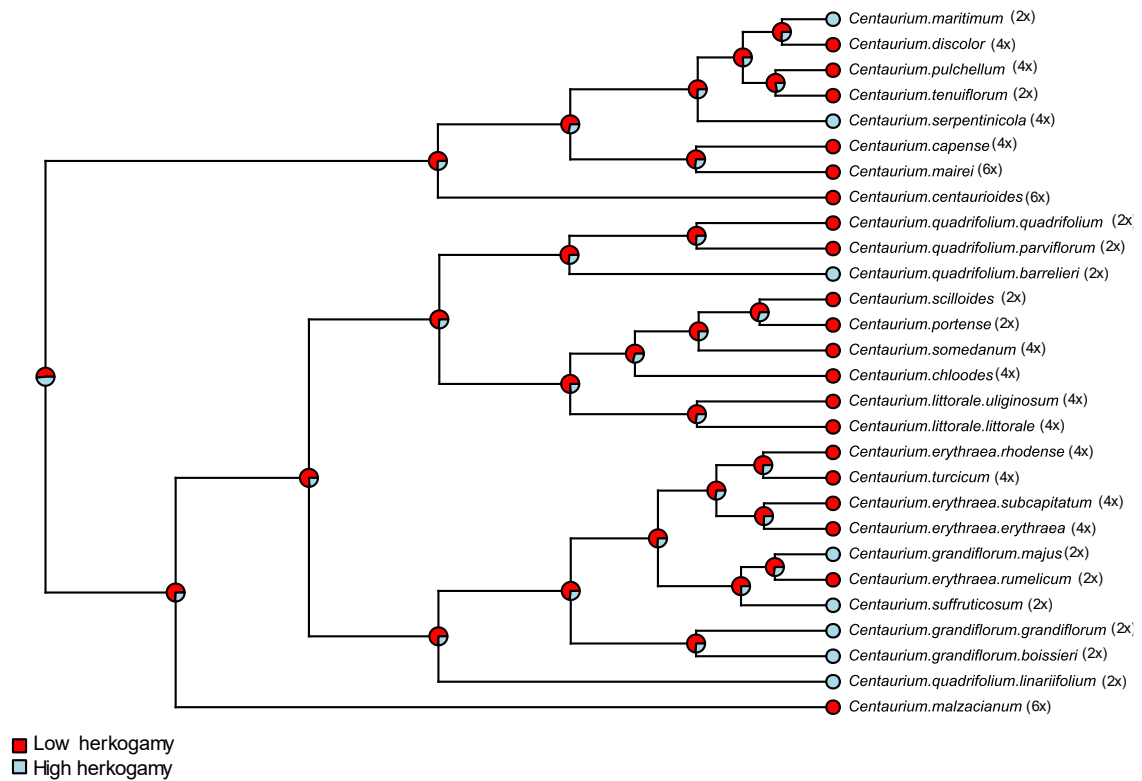

F)

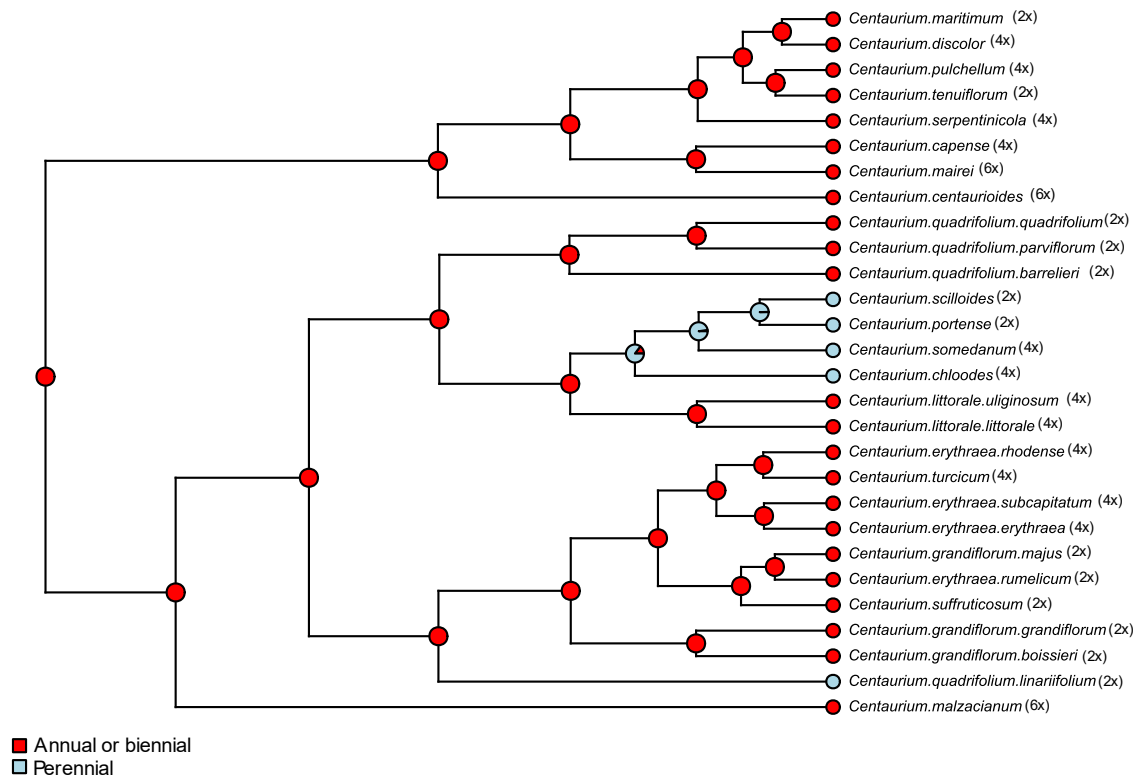

Supplement: Image_3.PDF [file Image_3.PDF]
