# Supplementary material for: The interplay between climatic niche evolution, polyploidy and reproductive traits explains plant speciation in the Mediterranean Basin: a case study in Centaurium (Gentianaceae)
Source: Frontiers journal article supplement (doi:10.3389/fpls.2024.1439985), 2024-08-09
Supplement: Table_1.PDF [file Table_1.PDF]

**Table S1.** Studied *Centaureum* taxa, ploidy level, chromosome number, number of records per taxa used in the climatic reconstruction of the genus, including political countries describing the natural distribution of the taxa and studied binary traits. The codification of the binary traits was as follows: diploid taxa were coded as “0” and tetra- and hexaploids as “1”; the length of the flower (flower size, FS) was coded as “0” (small- to-medium, < 15 mm) or “1” (large, > 15.1 mm); the flower display (FD) was the total number of flowers simultaneously present during anthesis and was coded as “0” (low number of flowers, < 30 flowers per plant) or “1” (high number of flowers, >30 flowers per plant); taxa with low herkogamy (Hk) were coded as “0” and the ones with high herkogamy as “1”. Annual or biennial species were coded as “0” and perennial ones as “1”.

| Taxa                                             | Ploidy level | Chromosome number (n) | N° of records: political country (records/country)                                                                                                                                                                                                                                                                                     | Ploidy (binary) | FS | FD | Hk | LC |
|--------------------------------------------------|--------------|-----------------------|----------------------------------------------------------------------------------------------------------------------------------------------------------------------------------------------------------------------------------------------------------------------------------------------------------------------------------------|-----------------|----|----|----|----|
| <i>C. capense</i> Broome                         | 4x           | 18                    | 43: Mexico (43)                                                                                                                                                                                                                                                                                                                        | 1               | 0  | 1  | 0  | 1  |
| <i>C. centaurioides</i> R.S. Rao & Hemadri       | 6x           | 28                    | 21: India (21)                                                                                                                                                                                                                                                                                                                         | 1               | 0  | 0  | 0  | 0  |
| <i>C. chloodes</i> (Brot.) Samp.                 | 4x           | 20                    | 45: France (16), Portugal (8), Spain (21)                                                                                                                                                                                                                                                                                              | 1               | 0  | 0  | 0  | 1  |
| <i>C. discolor</i> (Gand.) Ronniger              | 4x           | 20                    | 60: Spain                                                                                                                                                                                                                                                                                                                              | 1               | 1  | 0  | 0  | 0  |
| <i>C. erythraea</i> Rafn subsp. <i>erythraea</i> | 4x           | 20                    | 303: Austria (1), Belgium (2), Bulgaria (5), Denmark (2), France (62), Georgia (1), Germany (8), Greece (18), Hungary (2), Iran (1), Ireland (9), Israel (1), Italy (65), Poland (2), Portugal (5), Romania (11), Russia (5), Slovenia (1), Spain (43), Sweden (1), Switzerland (20), Turkey (20), United Kingdom (6), Yugoslavia (12) | 1               | 0  | 1  | 0  | 0  |

|                                                                              |    |    |                                                                                                                                       |   |   |   |   |   |
|------------------------------------------------------------------------------|----|----|---------------------------------------------------------------------------------------------------------------------------------------|---|---|---|---|---|
| <i>C. erythraea</i> subsp.<br><i>rhodense</i> (Boiss. & Reut.)<br>Melderis   | 4x | 20 | 55: Greece (10), Italy (22), Spain (10), Syria<br>(1), Turkey (12)                                                                    | 1 | 0 | 1 | 0 | 0 |
| <i>C. erythraea</i> subsp.<br><i>rumelicum</i> (Velen.)<br>Melderis          | 2x | 10 | 25: Algeria (2), France (5), Greece (5), Italy<br>(2), Spain (2), Turkey (9)                                                          | 0 | 0 | 1 | 0 | 0 |
| <i>C. erythraea</i> var.<br><i>subcapitatum</i> (Corb.)<br>Ubsdell           | 4x | 20 | 8: France (4), Ireland (3), Spain (1)                                                                                                 | 1 | 0 | 1 | 0 | 0 |
| <i>C. grandiflorum</i> subsp.<br><i>boissieri</i> (Willk.) Z. Díaz           | 2x | 10 | 35: Spain (35)                                                                                                                        | 0 | 1 | 1 | 1 | 0 |
| <i>C. grandiflorum</i> (Pers.)<br>Ronniger subsp.<br><i>grandiflorum</i>     | 2x | 10 | 33: France (1), Spain (32)                                                                                                            | 0 | 1 | 1 | 1 | 0 |
| <i>C. grandiflorum</i> subsp.<br><i>majus</i> (Hoffmanns. & Link)<br>Z. Díaz | 2x | 10 | 75: Italy (14), Portugal (18), Spain (43)                                                                                             | 0 | 1 | 1 | 1 | 0 |
| <i>C. littorale</i> (Turner)<br>Gilmour subsp. <i>littorale</i>              | 4x | 20 | 81: Denmark (5), Estonia (56), Germany (2),<br>Netherlands (11), Norway (1), Russia (1),<br>Sweden (3), United Kingdom (2)            | 1 | 0 | 0 | 0 | 0 |
| <i>C. littorale</i> subsp.<br><i>uliginosum</i> (Waldst. & Kit.)<br>Melderis | 4x | 20 | 19: Austria (1), Denmark (4), France (1),<br>Holand (1), Hungary (3), Sweden (2),<br>Czechoslovakia (4), United Kingdom (3)           | 1 | 0 | 0 | 0 | 0 |
| <i>C. mairei</i> Zeltner                                                     | 6x | 27 | 134: Algeria (18), Chypre (10), Egypt (15),<br>India (4), Iran (63), Iraq (1), Israel (1),<br>Jordan (5), Niger (2), North Yemen (3), | 1 | 0 | 0 | 0 | 0 |

|                                                                              |    |    |                                                                                                                                                                                                                                                                                                                                                                                                                                                                       |   |   |   |   |   |
|------------------------------------------------------------------------------|----|----|-----------------------------------------------------------------------------------------------------------------------------------------------------------------------------------------------------------------------------------------------------------------------------------------------------------------------------------------------------------------------------------------------------------------------------------------------------------------------|---|---|---|---|---|
|                                                                              |    |    | Oman (4), Russia (1), Arabia Saudi (2),<br>Senegal (1), Spain (1), Turkey (3)                                                                                                                                                                                                                                                                                                                                                                                         |   |   |   |   |   |
| <i>C. malzacianum</i> Maire                                                  | 6x | 28 | 23: United Arab Emirates (1), Iran (3),<br>North Yemen (8), Oman (11)                                                                                                                                                                                                                                                                                                                                                                                                 | 1 | 1 | 0 | 0 | 0 |
| <i>C. maritimum</i> (L.) Fritsch                                             | 2x | 10 | 48: Algeria (1), France (5), Greece (1), Italy<br>(2), Morocco (1), Portugal (10), Spain (28)                                                                                                                                                                                                                                                                                                                                                                         | 0 | 1 | 0 | 1 | 0 |
| <i>C. portense</i> Butcher                                                   | 2x | 10 | 7: Portugal (7)                                                                                                                                                                                                                                                                                                                                                                                                                                                       | 0 | 1 | 0 | 0 | 1 |
| <i>C. pulchellum</i> (Sw.) Druce                                             | 4x | 18 | 380: Afganistan (2), Algeria (13), Armenia<br>(1), Austria (1), Belgium (1), Bulgaria (1),<br>China (26), Chypre (8), Crete (3), Denmark<br>(1), Finland (1), France (21), Greece (29),<br>Holand (1), Hungary (1), India (6), Iran (25),<br>Israel (4), Italy (19), Morocco (19), Oman<br>(4), Portugal (4), Rumania (4), Russia (12),<br>Sardinia (1), Spain (97), Sweden (3), Syria<br>(2), Czechoslovakia (1), Turkey (63), United<br>Kingdom (3), Yugoslavia (3) | 1 | 0 | 0 | 0 | 0 |
| <i>C. quadrifolium</i> subsp.<br><i>barrelieri</i> (L.M. Dufour) G.<br>López | 2x | 10 | 20: Spain (20)                                                                                                                                                                                                                                                                                                                                                                                                                                                        | 0 | 1 | 1 | 1 | 0 |
| <i>C. quadrifolium</i> subsp.<br><i>linariifolium</i> (Lam.) G.<br>López     | 2x | 10 | 12: Spain (12)                                                                                                                                                                                                                                                                                                                                                                                                                                                        | 0 | 1 | 1 | 1 | 1 |

|                                                                                     |    |    |                                                                                                                                    |   |   |   |   |   |
|-------------------------------------------------------------------------------------|----|----|------------------------------------------------------------------------------------------------------------------------------------|---|---|---|---|---|
| <i>C. quadrifolium</i> subsp.<br><i>parviflorum</i> (Willk.) Pedrol                 | 2x | 10 | 14: France (3), Spain (11)                                                                                                         | 0 | 0 | 0 | 0 | 0 |
| <i>C. quadrifolium</i> subsp.<br><i>quadrifolium</i> (L.) G. López<br>& C.E. Jarvis | 2x | 10 | 17: Spain (17)                                                                                                                     | 0 | 0 | 1 | 0 | 0 |
| <i>C. scilloides</i> (L. fil.) Samp.                                                | 2x | 10 | 13: Portugal (9), Spain (4)                                                                                                        | 0 | 1 | 0 | 0 | 1 |
| <i>C. serpentinicola</i> Carlström                                                  | 4x | 20 | 19: Greece (11), Turkey (8)                                                                                                        | 1 | 1 | 0 | 1 | 0 |
| <i>C. somedanum</i> M. Laínz                                                        | 4x | 20 | 70: Spain (70)                                                                                                                     | 1 | 1 | 0 | 0 | 1 |
| <i>C. suffruticosum</i> (Griseb.)<br>Ronniger                                       | 2x | 10 | 29: Algeria (6), Morocco (16), Spain (7)                                                                                           | 0 | 0 | 1 | 1 | 0 |
| <i>C. tenuiflorum</i> (Hoffmanns.<br>& Link) Fritsch                                | 2x | 20 | 77: Algeria (1), Chypre (1), Greece (7), Iran<br>(2), Italy (3), Morocco (4), Portugal (9),<br>Spain (40), Turkey (10)             | 0 | 0 | 1 | 0 | 0 |
| <i>C. turcicum</i> (Velen.)<br>Ronniger                                             | 4x | 20 | 24: Algeria (1), Chypre (1), Greece (7), Iran<br>(5), Italy (3), Morocco (4), Portugal (9),<br>Russia (3), Spain (40), Turkey (28) | 1 | 0 | 1 | 0 | 0 |
